# Supplementary material for: Performance of pitcher-type POU filters for the removal of 75 PFAS from drinking water: comparing different water sources
Source: Frontiers journal article supplement (doi:10.3389/fenvc.2024.1376079), 2024-06-04
Supplement: Table_1.xlsx [file Table_1.xlsx]

## Sheet: Information
Supporting Information
Performance of Pitcher-Type POU Filters for the Removal of 75 PFAS from Drinking Water: Comparing Different Water Sources
Termeh Teymoorian1, Quoc Tuc Dinh1, Benoit Barbeau2, Sébastien Sauvé1*
1 Department of Chemistry, Université de Montréal, Montreal, Quebec H3C 3J7, Canada
2 Department of Civil, Geological and Mining Engineering, Ecole Polytechnique Montreal, Montreal, Quebec H3C 3A7, Canada
Table of Contents
Table S1. List of the 75 PFAS certified standards included in the targeted LC-MS method.
Table S2. List of the 28 surrogate internal standards.
Table S3. UHPLC-HRMS acquisition method.
Table S4. Limits of detection (LODs)
Table S5. Accuracy %
Table S6. pH variations - Saint-Donat tap water
Table S7. pH variations - Montreal tap water
Table S8. Data of removal performance of selected POU filters for Σ75PFAS, TOC, TDS, chloride, and sulfate, using Saint-Donat tap water across increasing filtered volumes (20, 40, 80, & 160 L).
Table S9. Data of removal performance of selected POU filters for Σ75PFAS, TOC, TDS, chloride, and sulfate, using Montreal tap water across increasing filtered volumes (20, 40, 80, & 160 L).
Table S10. Concentrations of PFAS (ng/L) before and after filtration

## Sheet: S1.
Table S1. List of the 75 PFAS certified standards included in the targeted LC-MS method.
Category	Acronym	Name	Supplier	Ion mode
PFCAs	PFBA	Perfluorobutanoic acid	Wellington Labs	ESI(-)
	PFPeA	Perfluoropentanoic acid	Wellington Labs	ESI(-)
	PFHxA	Perfluorohexanoic acid	Wellington Labs	ESI(-)
	PFHpA	Perfluoroheptanoic acid	Wellington Labs	ESI(-)
	PFOA	Perfluorooctanoic acid	Wellington Labs	ESI(-)
	PFNA	Perfluorononanoic acid	Wellington Labs	ESI(-)
	PFDA	Perfluorodecanoic acid	Wellington Labs	ESI(-)
	PFUnA	Perfluoroundecanoic acid	Wellington Labs	ESI(-)
	PFDoA	Perfluorododecanoic acid	Wellington Labs	ESI(-)
	PFTrDA	Perfluorotridecanoic acid	Wellington Labs	ESI(-)
	PFTeDA	Perfluorotetradecanoic acid	Wellington Labs	ESI(-)
	PFHxDA	Perfluorohexadecanoic acid	Wellington Labs	ESI(-)
	PFOcDA	Perfluorooctadecanoic acid	Wellington Labs	ESI(-)
PFSAs	PFEtS	Perfluoroethane sulfonate	Apollo Scientific	ESI(-)
	PFPrS	Perfluoropropane sulfonate	Wellington Labs	ESI(-)
	PFBS	Perfluorobutane sulfonate	Wellington Labs	ESI(-)
	PFPeS	Perfluoropentane sulfonate	Wellington Labs	ESI(-)
	PFHxS	Perfluorohexane sulfonate	Wellington Labs	ESI(-)
	PFHpS	Perfluoroheptane sulfonate	Wellington Labs	ESI(-)
	PFOS	Perfluorooctane sulfonate	Wellington Labs	ESI(-)
	PFNS	Perfluorononane sulfonate	Wellington Labs	ESI(-)
	PFDS	Perfluorodecane sulfonate	Wellington Labs	ESI(-)
	PFUdS	Perfluoroundecane sulfonate	Wellington Labs	ESI(-)
	PFDoS	Perfluorododecane sulfonate	Wellington Labs	ESI(-)
	PFTrDS	Perfluorotridecane sulfonate	Wellington Labs	ESI(-)
Cyclic PFSA	PFECHS	Perfluoro-4-ethylcyclohexane sulfonate	Wellington Labs	ESI(-)
FASAs/FASAAs	FBSA	Perfluorobutane sulfonamide	Wellington Labs	ESI(-)
	FHxSA	Perfluorohexane sulfonamide	Wellington Labs	ESI(-)
	FHpSA	Perfluoroheptane sulfonamide	Wellington Labs	ESI(-)
	FOSA	Perfluorooctane sulfonamide	Wellington Labs	ESI(-)
	FDSA	Perfluorodecane sulfonamide	Wellington Labs	ESI(-)
	MeFBSA	N-methyl-perfluorobutane sulfonamide	Wellington Labs	ESI(-)
	MeFOSA	N-methyl-perfluorooctane sulfonamide	Wellington Labs	ESI(-)
	EtFOSA	N-ethyl-perfluorooctane sulfonamide	Wellington Labs	ESI(-)
	FOSAA	Perfluorooctane sulfonamidoacetic acid	Wellington Labs	ESI(-)
	MeFOSAA	N-methyl-perfluorooctane sulfonamidoacetic acid	Wellington Labs	ESI(-)
	EtFOSAA	N-ethyl-perfluorooctane sulfonamidoacetic acid	Wellington Labs	ESI(-)
FTCAs/FTUCAs	3:3 acid	3:3 fluorotelomer carboxylic acid	Synquest	ESI(-)
	4:3 acid	4:3 fluorotelomer carboxylic acid	Synquest	ESI(-)
	5:3 acid	5:3 fluorotelomer carboxylic acid	DuPont USA	ESI(-)
	7:3 acid	7:3 fluorotelomer carboxylic acid	DuPont USA	ESI(-)
	6:2 FTCA	6:2 fluorotelomer carboxylic acid	Wellington Labs	ESI(-)
	8:2 FTCA	8:2 fluorotelomer carboxylic acid	Wellington Labs	ESI(-)
	10:2 FTCA	10:2 fluorotelomer carboxylic acid	Wellington Labs	ESI(-)
	6:2 FTUCA	6:2 fluorotelomer unsaturated carboxylic acid	Wellington Labs	ESI(-)
	8:2 FTUCA	8:2 fluorotelomer unsaturated carboxylic acid	Wellington Labs	ESI(-)
	10:2 FTUCA	10:2 fluorotelomer unsaturated carboxylic acid	Wellington Labs	ESI(-)
FTSAs	4:2 FTSA	4:2 fluorotelomer sulfonate	Wellington Labs	ESI(-)
	6:2 FTSA	6:2 fluorotelomer sulfonate	Wellington Labs	ESI(-)
	8:2 FTSA	8:2 fluorotelomer sulfonate	Wellington Labs	ESI(-)
	10:2 FTSA	8:2 fluorotelomer sulfonate	Wellington Labs	ESI(-)
Phosph. Acids	6:6 PFPi	Bis(perfluorohexyl)phosphinate	Wellington Labs	ESI(-)
	6:8 PFPi	Perfluorohexylperfluorooctylphosphinate	Wellington Labs	ESI(-)
	8:8 PFPi	Bis(perfluorooctyl)phosphinate	Wellington Labs	ESI(-)
	PFHxPA	Perfluorohexylphosphonic acid	Wellington Labs	ESI(-)
	PFOPA	Perfluorooctylphosphonic acid	Wellington Labs	ESI(-)
Ether-PFAS	6:2 Cl-PFESA	6:2 chlorinated perfluoroalkylether sulfonate	Wellington Labs	ESI(-)
	8:2 Cl-PFESA	8:2 chlorinated perfluoroalkylether sulfonate	Wellington Labs	ESI(-)
	Gen-X (HFPO-DA)	Hexafluoropropylene oxide dimer acid	Wellington Labs	ESI(-)
	ADONA	Dodecafluoro-3H-4,8-dioxanonanoate	Wellington Labs	ESI(-)
	PFMPA	Perfluoro-4-oxapentanoic acid	Wellington Labs	ESI(-)
	PFMBA	Perfluoro-5-oxahexanoic acid	Wellington Labs	ESI(-)
	3,6-OPFHpA	Perfluoro-3,6-dioxaheptanoic acid	Wellington Labs	ESI(-)
	PFEESA	Perfluoro(2-ethoxyethane)sulfonate	Wellington Labs	ESI(-)
ESI+ ECF prec.	AmPr-FHxSA (PFHxSAm)	Perfluorohexane sulfonamidopropyl amine	Wellington Labs	ESI(+)
	AmPr-FOSA (PFOSAm)	Perfluorooctane sulfonamidoalkyl amine	Fluobon	ESI(+)
	T-AmPr-FHxSA (PFHxSAmS)	Perfluorohexane sulfonamidopropyl ammonium	Wellington Labs	ESI(+)
	T-AmPr-FOSA (PFOSAmS)	Perfluorooctane sulfonamidopropyl ammonium	Fluobon	ESI(+)
	CMeAmPr-FOAd (PFOAB)	Perfluorooctane amidopropyl betaine	Fluobon	ESI(+)
	CMeAmPr-FOSA (PFOSB)	Perfluorooctane sulfonamidopropyl betaine	Fluobon	ESI(+)
	OAmPr-FOAd (PFOANO)	Perfluorooctane amidopropyl amine oxide	Fluobon	ESI(+)
	OAmPr-FOSA (PFOSNO)	Perfluorooctane sulfonamidopropyl amine oxide	Fluobon	ESI(+)
ESI+ FTAB/FTBs	5:3 FTB	5:3 fluorotelomer betaine	Wellington Labs	ESI(+)
	5:1:2 FTB	5:1:2 fluorotelomer betaine	Wellington Labs	ESI(+)
	6:2 FTSA-PrB (6:2 FTAB)	6:2 fluorotelomer sulfonamidopropyl betaine	Wellington Labs	ESI(+)

## Sheet: S2.
Table S2. List of the 28 surrogate internal standards.
Acronym	Name	Supplier
13C4-PFBA	Perfluoro-n-[1,2,3,4-13C4]butanoic acid	Wellington Labs
13C5-PFPeA	Perfluoro-n-[13C5]pentanoic acid	Wellington Labs
13C5-PFHxA	Perfluoro-n-[1,2,3,4,6-13C5]hexanoic acid	Wellington Labs
13C4-PFHpA	Perfluoro-n-[1,2,3,4-13C4]heptanoic acid	Wellington Labs
13C8-PFOA	Perfluoro-n-[13C8]octanoic acid	Wellington Labs
13C9-PFNA	Perfluoro-n-[13C9]nonanoic acid	Wellington Labs
13C6-PFDA	Perfluoro-n-[1,2,3,4,5,6-13C6]decanoic acid	Wellington Labs
13C7-PFUnA	Perfluoro-n-[1,2,3,4,5,6,7-13C7]undecanoic acid	Wellington Labs
13C2-PFDoA	Perfluoro-n-[1,2-13C2]dodecanoic acid	Wellington Labs
13C2-PFTeDA	Perfluoro-n-[1,2-13C2]tetradecanoic acid	Wellington Labs
13C3-PFBS	Sodium perfluoro-1-[2,3,4-13C3]butanesulfonate	Wellington Labs
13C3-PFHxS	Sodium perfluoro-1-[1,2,3-13C3]hexanesulfonate	Wellington Labs
13C8-PFOS	Sodium perfluoro-1-[13C8]octanesulfonate	Wellington Labs
13C8-FOSA	Perfluoro-1-[13C8]octanesulfonamide	Wellington Labs
d3-N-MeFOSA	N-methyl-d3-perfluoro-1-octanesulfonamide	Wellington Labs
d5-N-EtFOSA	N-ethyl-d5-perfluoro-1-octanesulfonamide	Wellington Labs
d3-N-MeFOSAA	N-methyl-d3-perfluoro-1-octanesulfonamidoacetic acid	Wellington Labs
d5-N-EtFOSAA	N-ethyl-d5-perfluoro-1-octanesulfonamidoacetic acid	Wellington Labs
13C2-6:2 FTCA	2-Perfluorohexyl (1,2-13C2)ethanoic acid	Wellington Labs
13C2-8:2 FTCA	2-Perfluorooctyl (1,2-13C2)ethanoic acid	Wellington Labs
13C2-10:2 FTCA	2-Perfluorodecyl (1,2-13C2)ethanoic acid	Wellington Labs
13C2-6:2 FTUCA	2H-Perfluorohexyl (1,2-13C2)octenoic acid	Wellington Labs
13C2-8:2 FTUCA	2H-Perfluorohexyl (1,2-13C2)decenoic acid	Wellington Labs
13C2-10:2 FTUCA	2H-Perfluorohexyl (1,2-13C2)dodecenoic acid	Wellington Labs
13C2-6:2 FTSA	1H,1H,2H,2H-perfluoro-1-[1,2-13C2]-octane sulfonate	Wellington Labs
13C2-8:2 FTSA	1H,1H,2H,2H-perfluoro-1-[1,2-13C2]-decane sulfonate	Wellington Labs
13C3-HFPO-DA	2,3,3,3-tetrafluoro-2-(1,1,2,2,3,3,3-heptafluoropropoxy)-13C3-propanoic acid	Wellington Labs
TAmPr-FOAd (PFOAAmS)	Trimethylammoniopropyl perfluorooctane amide	Fluobon

## Sheet: S3.
Table S3. UHPLC-HRMS acquisition method.
Instrument	Thermo Q-Exactive Orbitrap mass spectrometer
Analytical column	Thermo Hypersil Gold C18 column (100 mm × 2.1 mm; 1.9 μm particle size)
Delay column	Thermo Hypercarb column (20 mm × 2.1 mm; 7 μm particle size)
Column Temperature	40°C
Ionization and acquisition modes	Negative and positive electrospray ionization modes, Full Scan MS
Mobile Phases	A: 0.1% formic acid in HPLC-water
	B: 0.1% formic acid in acetonitrile
Flow rate	0.55 mL/min
Injection Volume	20 μL
Orbitrap parameters	Resolution setting 70,000 at m/z 200
	Scan range (m/z) 150–1000

## Sheet: S4.
Table S4. Limits of detection (LOD) -ng/L
PFBA	0.11
PFPeA	0.07
PFHxA	0.028
PFHpA	0.021
PFOA	0.015
PFNA	0.01
PFDA	0.003
PFUnDA	0.007
PFDoDA	0.005
PFTrDA	0.002
PFTeDA	0.162
PFHxDA	0.044
PFOcDA	0.013
PFPrS	0.002
PFEtS	0.007
PFBS	0.002
PFPeS	0.004
PFHxS	0.002
PFHpS	0.001
PFOS	0.008
PFNS	0.003
PFDS	0.003
PFUdS	0.003
PFDoS	0.023
PFTrDS	0.15
FBSA	0.008
FHxSA	0.003
FHpSA	0.003
FOSA	0.008
FDSA	0.005
MeFBSA	0.009
MeFOSA	0.015
EtFOSA	0.012
FOSAA	0.011
MeFOSAA	0.005
EtFOSAA	0.01
3:3 Acid	0.209
4:3 Acid	0.017
5:3 Acid	0.012
7:3 Acid	0.008
6:2 FTCA	0.025
8:2 FTCA	0.02
10:2 FTCA	0.025
6:2 FTUCA	0.006
8:2 FTUCA	0.004
10:2 FTUCA	0.007
4:2 FTSA	0.002
6:2 FTSA	0.172
8:2 FTSA	0.002
10:2 FTSA	0.01
6:6 PFPi	0.002
6:8 PFPi	0.287
8:8 PFPi	0.175
PFHxPA	0.006
PFOPA	0.003
PFECHS	0.001
Gen-X	0.177
ADONA	0.001
6:2 Cl-PFESA	0.003
8:2 Cl-PFESA	0.005
PFMPA	0.063
PFMBA	0.014
3,6-OPFHpA	0.016
PFEESA	0.002
PFHxSAm	0.003
PFOSAm	0.013
PFHxSAmS	0.003
PFOSAmS	0.018
PFOANO	0.006
PFOSNO	0.016
PFOAB	0.017
PFOSB	0.037
5:3 FTB	0.003
5:1:2 FTB	0.003
6:2 FTAB	0.024

## Sheet: S5.
Table S5. Accuracy %
	PFBA	PFPeA	PFHxA	PFHpA	PFOA	PFNA	PFDA	PFUnDA	PFDoDA	PFTrDA	PFTeDA	PFHxDA	PFOcDA	PFPrS	PFEtS	PFBS	PFPeS	PFHxS	PFHpS	PFOS	PFNS	PFDS	PFUdS	PFDoS	PFTrDS	FBSA	FHxSA	FHpSA	FOSA	FDSA	MeFBSA	MeFOSA	EtFOSA	FOSAA	MeFOSAA	EtFOSAA	3:3 Acid	4:3 Acid	5:3 Acid	7:3 Acid	6:2 FTCA	8:2 FTCA	10:2 FTCA	6:2 FTUCA	8:2 FTUCA	10:2 FTUCA	4:2 FTSA	6:2 FTSA	8:2 FTSA
QC1	93.698	88.5541	84.3491	89.1363	86.7623	89.5176	88.0047	87.1249	92.8339	100.539	97.366	99.0497	96.491	88.0095	82.1966	86.8318	103.805	87.4478	68.3666	90.6693	105.386	129.384	140.501	162.728	155.843	118.022	106.703	97.9013	90.0015	128.095	119.485	91.7634	91.5543	91.7031	87.0857	83.6234	90.1102	90.5794	119.952	73.2416	84.9198	93.3444	115.371	91.087	92.7928	113.119	88.5251	85.7126	84.3972
QC2	97.2578	91.7064	91.18	94.2055	93.0802	88.0921	86.5325	88.7651	100.863	94.2171	101.882	104.946	108.266	91.522	84.6692	92.981	98.6064	90.4919	72.2289	88.1261	99.1465	120.497	116.371	115.326	110.185	113.995	105.847	97.3997	93.6306	118.73	109.315	91.573	87.1368	72.9451	86.9944	86.9372	99.1205	100.963	117.582	85.1552	94.0248	89.4354	103.796	95.7002	91.4596	105.248	84.9627	88.5002	83.7239
QC3	94.3077	95.4606	95.7721	92.2071	92.9105	95.7161	94.6329	94.6598	103.478	96.1397	103.272	106.145	112.902	92.9962	87.1903	93.1892	94.2097	92.5362	92.9385	97.0995	93.6326	104.799	98.4664	91.8349	77.991	103.987	99.8353	97.9581	102.483	112.415	107.394	85.9568	96.0581	68.834	95.1192	100.663	102.469	98.8595	108.856	89.3103	90.3707	101.003	105.787	94.2668	99.7912	115.527	90.9705	90.0745	93.5255
Mean accuracy %	95.0879	91.907	90.4337	91.8496	90.9177	91.1086	89.7234	90.1833	99.0582	96.9652	100.84	103.38	105.886	90.8426	84.6854	91.0007	98.8739	90.1587	77.8447	91.965	99.3883	118.227	118.446	123.297	114.673	112.001	104.128	97.753	95.3718	119.747	112.065	89.7644	91.5831	77.8274	89.7331	90.4078	97.2332	96.8008	115.463	82.569	89.7718	94.5943	108.318	93.6847	94.6812	111.298	88.1528	88.0958	87.2155
RSD%	2.00216	3.76207	6.35593	2.78003	3.95924	4.44891	4.80925	4.39391	5.59957	3.34215	3.06189	3.6736	7.99003	2.82009	2.94841	3.96901	4.85817	2.84001	16.9742	5.02898	5.9166	10.5295	17.8087	29.2892	34.1141	6.45224	3.59417	0.314385	6.7321	6.58853	5.7984	3.67499	4.87068	15.6645	5.19844	9.99273	6.5738	5.67098	5.06102	10.1015	5.10401	6.22055	5.71375	2.52022	4.7267	4.8305	3.42715	2.5074	6.27752
[truncated: 26 more columns]

## Sheet: S6.
Table S6. pH variations - Saint-Donat tap water
Saint-Donat Tap water	Brita (Elite)		Aquagear		ZeroWater		ClearlyFiltered
Volume (L)	In. pH	Eff. pH	In. pH	Eff. pH	In. pH	Eff. pH	In. pH	Eff. pH
20	6.9	NA	6.11	6.06	6.17	7.3	6.99	7.22
40	NA	7.68	6.82	6.6	NA	NA	NA	7.29
80	6.83	6.26	7.1	7	6.03	2.67	NA	7.29
160	6.95	7.24	7.14	7.3	6	5.63	6.69	6.45
Note: NA = Not available
Since the tap waters were collected in buckets and stored before use, slight decrease/increase in initial pH values can occur during use, as observed in some recorded pH values. This phenomenon may be attributed to contact with CO2 in the air or CO2 off-gassing.

## Sheet: S7.
Table S7. pH variations - Montreal tap water
Montreal Tap water	Brita (Elite)		Aquagear		ClearlyFiltered
Volume (L)	In. pH	Eff. pH	In. pH	Eff. pH	In. pH	Eff. pH
20	NA	NA	7.7	7.47	7.68	7
40	7.64	7.6	7.96	7.71	7.28	7.7
80	7.67	7.5	7.73	7.43	7.83	7.73
160	7.86	7.16	7.97	7.5	NA	7.73
Note: NA = Not available
Since the tap waters were collected in buckets and stored before use, slight decrease/increase in initial pH values can occur during use, as observed in some recorded pH values. This phenomenon may be attributed to contact with CO2 in the air or CO2 off-gassing.

## Sheet: S8.
Table S8. Data of removal performance of selected POU filters for Σ75PFAS, TOC, TDS, chloride, and sulfate, using Saint-Donat tap water across increasing filtered volumes (20, 40, 80, & 160 L).
Note: The data for the collected samples at 20 L and 40 L for Brita (Elite) is not available
Brita (Elite)- St. Donat
Volume (L)	Σ75 PFAS (ng/L) (ng/L)		TOC (mg/L)		TDS (mg/L)		Chloride (mg/L)		Sulphate (mg/L)
	Inf.	Eff.	Inf.	Eff.	Inf.	Eff.	Inf.	Eff.	Inf.	Eff.
20	38.6578	24.561	0.81		155		104.425		9.1783
40	42.12	27.8827
80	43.8202	37.767	0.8	0.76	160.1	160.6	110.346	111.602	9.4022	9.3828
160	57.0272	52.6801	0.84	0.78	203	208	115.383	119.08	10.5283	10.8897
Zerowater- St. Donat
Volume (L)	Σ75 PFAS (ng/L)		TOC (mg/L)		TDS (mg/L)		Chloride (mg/L)		Sulphate (mg/L)
	Inf.	Eff.	Inf.	Eff.	Inf.	Eff.	Inf.	Eff.	Inf.	Eff.
20	59.7202	0	0.86	0.04	208	0.3	120.317	<MDL	10.8733	<MDL
40	59.7942	0	0.83	0.06	207	0.4	119.469	<MDL	10.788	<MDL
80	60.7794	0.734892	0.81	1.47	166	255	115.496	60.5228	9.6521	<MDL
160	59.8163	0.365947	0.804	0.604	183.7	170	133.488	143.388	10.4721	<MDL
Aquagear- St. Donat
Volume (L)	Σ75 PFAS (ng/L)		TOC (mg/L)		TDS (mg/L)		Chloride (mg/L)		Sulphate (mg/L)
	Inf.	Eff.	Inf.	Eff.	Inf.	Eff.	Inf.	Eff.	Inf.	Eff.
20	55.8368	4.68725	0.83	0.3	177	183	129.565	129.581	10.2613	54.6589
40	63.265	8.72668	0.82	0.27	174	174.4	122.971	133.263	9.2518	11.6958
80	59.2917	17.7367	0.8	0.43	177	179.2	126.632	134.652	9.5653	11.1239
160	60.4839	17.4556	0.811	0.419	181.5	181	123.996	120.47	9.6521	9.1686
ClearlyFiltered- St. Donat
Volume (L)	Σ75 PFAS (ng/L)		TOC (mg/L)		TDS (mg/L)		Chloride (mg/L)		Sulphate (mg/L)
	Inf.	Eff.	Inf.	Eff.	Inf.	Eff.	Inf.	Eff.	Inf.	Eff.
20	58.6005	0.701693	0.8	0.0665	169.2	171.1	125.949	125.266	10.965	10.686
40	60.3926	0.461861	0.795	0.015	171	175.3	126.866	126.601	10.978	10.809
80	61.9957	0.787251	0.819	0.101	179.6	184.5	126.878	126.366	10.95	10.577
160	61.2994	0.951323	0.812	0.0535	170.3	173	126.758	126.858	10.979	11.15

## Sheet: S9.
Table S9. Data of removal performance of selected POU filters for Σ75PFAS, TOC, TDS, chloride, and sulfate, using Montreal tap water across increasing filtered volumes (20, 40, 80, & 160 L).
Brita (Elite)- Montreal
Volume (L)	Σ75 PFAS (ng/L)		TOC (mg/L)		TDS (mg/L)		Chloride (mg/L)		Sulphate (mg/L)
	Inf.	Eff.	Inf.	Eff.	Inf.	Eff.	Inf.	Eff.	Inf.	Eff.
20	15.0475	3.60887	2.19	1.5	97.5	100	23.2961	22.6671	19.8941	19.4791
40	14.425	7.84255	2.08	1.75	99.6	99.7	24.1429	23.925	20.394	20.2053
80	14.7047	8.63617	2.19	1.82	99.7	100.5	23.4003	23.0681	19.4956	19.1438
160	14.5884	8.90672	2.16	1.86	99.7	101.5	26.2648	26.4557	20.3952	20.352
Brita (Standard)- Montreal
Volume (L)	Σ75 PFAS (ng/L)		TOC (mg/L)		TDS (mg/L)		Chloride (mg/L)		Sulphate (mg/L)
	Inf.	Eff.	Inf.	Eff.	Inf.	Eff.	Inf.	Eff.	Inf.	Eff.
20	14.5551	6.63117	2.17	1.72	99.2	57.5	24.8166	24.4269	21.3233	20.2167
40	13.5803	6.6051	2.19	1.31	101	66.1	24.3885	25.3498	21.023	21.5429
80	14.9206	10.0946	2.1	1.82	99.4	80.7	24.9246	25.3512	21.3133	21.529
160	13.7616	10.2344	2.08	1.86	101	86.7	23.6422	23.2362	20.0651	19.8951
Zerowater- Montreal
Volume (L)	Σ75 PFAS (ng/L)		TOC (mg/L)		TDS (mg/L)		Chloride (mg/L)		Sulphate (mg/L)
	Inf.	Eff.	Inf.	Eff.	Inf.	Eff.	Inf.	Eff.	Inf.	Eff.
20	13.3232	0.0116338	2.33	0.32	98.3	0.2	21.8393	<MDL	18.3868	<MDL
40	14.2733	0.0232574	2.35	0.4	98.7	0.153	21.8304	<MDL	18.2632	<MDL
80	13.742	0	2.33	0.39	99.4	0.13	23.4761	<MDL	20.0914	<MDL
160	13.7941	0.0327937	2.33	1.09	100	7.2	24.6104	1.9106	20.812	<MDL
Zerowater- Montreal-Home batch
Volume (L)	Σ75 PFAS (ng/L)		TOC (mg/L)		TDS (mg/L)		Chloride (mg/L)		Sulphate (mg/L)
	Inf.	Eff.	Inf.	Eff.	Inf.	Eff.	Inf.	Eff.	Inf.	Eff.
20	8.84324	0.329999	2.23	0.392	100.7	0.988	24.303	0.205	20.835	0.292
40	9.85215	0.274358	2.27	0.442	101	1.105	24.603	0.201	21.156	0.291
80	9.70479	1.12358	2.23	0.433	102.5	2.57	24.922	0.202	21.34	0.294
140	8.38809	0.28765	2.18	0.661	101.5	3.07	24.066	0.493	20.552	0.418
Aquagear- Montreal
Volume (L)	Σ75 PFAS (ng/L)		TOC (mg/L)		TDS (mg/L)		Chloride (mg/L)		Sulphate (mg/L)
	Inf.	Eff.	Inf.	Eff.	Inf.	Eff.	Inf.	Eff.	Inf.	Eff.
20	9.82093	1.73357	2.44	1.59	94.5	94.6	22.667	22.504	18.335	20.43
40	9.90783	4.38791	2.42	2.05	92.4	91.4	22.68	22.719	18.347	18.596
80	9.76177	3.57723	2.46	1.98	95.4	98.2	22.681	22.648	18.34	18.707
160	9.04049	5.23228	2.27	2.01	97.8	94.2	22.377	22.39	18.023	18.049
ClearlyFiltered- Montreal
Volume (L)	Σ75 PFAS (ng/L)		TOC (mg/L)		TDS (mg/L)		Chloride (mg/L)		Sulphate (mg/L)
	Inf.	Eff.	Inf.	Eff.	Inf.	Eff.	Inf.	Eff.	Inf.	Eff.
20	12.3308	0.0735062	2.25	0.12	100	94.6	23.8827	22.619	19.3084	18.0768
40	14.5612	0.0183513	2.27	0.21	99.5	98.5	22.5004	22.3529	18.6262	18.8533
80	14.7228	0.371709	2.19	0.94	99	101	22.7001	22.1974	18.8575	18.3243
160	16.0973	2.11433	2.15	0.727	98.1	98.6	23.3951	22.4525	18.2156	18.0707

[truncated: 1 more sheets: S10.]
